# Supplementary material
Source: Elsevier journal article supplement (https://www.sciencedirect.com/science/article/pii/S1699258X2200122X)
Supplement: mmc1 [file S1699258X2200122X:mmc1.pdf]

|                  | SLE with FMF | SLE without FMF | FMF without SLE |
|------------------|--------------|-----------------|-----------------|
| Skin involvement | 2.10%        | 4.60%           | 1.70%           |
| Arthritis        | 55.20%       | 48.40%          | 50.40%          |
| Arthralgias      | 61.70%       | 61.20%          | 62.60%          |
| Fever            | 76.50%       | 32.70%          | 88.60%          |
| Fatigue          | 55.20%       | 27.80%          | 36.50%          |
| Amyloidosis      | 25.50%       | 4%              | 28.60%          |
| Serositis        | 36.10%       | 9.60%           | 35.60%          |

**Supplementary table S1.** Overlap symptoms in SLE and FMF.
