# Supplementary material
Source: Elsevier journal article supplement (https://www.sciencedirect.com/science/article/pii/S1699258X2200122X)
Supplement: mmc2 [file S1699258X2200122X:mmc2.pdf]

|           | SLE with FMF | SLE without FMF | FMF without SLE |
|-----------|--------------|-----------------|-----------------|
| Punjabi   | 10.60%       | 16.30%          | 31.30%          |
| Sindhi    | 6.30%        | 9.20%           | 18.20%          |
| Balochi   | 8.50%        | 9.10%           | 7.80%           |
| Pashtun   | 23.40%       | 40.00%          | 11.30%          |
| Muhajir   | 2.10%        | 3.00%           | 3.40%           |
| Kashmiri  | 19.10%       | 12.30%          | 12.10%          |
| Irani     | 14.80%       | 1.20%           | 8.60%           |
| Afghani   | 4.20%        | 6.00%           | 3.40%           |
| Caucasian | 10.60%       | 2.70%           | 3.40%           |

**Supplementary table S2.** Ethnicity in SLE and FMF.
